# Supplementary material for: A polychloride-enabled synthesis of [NEt3Me][PCl6] serving as a potential PCl3-storage and PCl5-reagent
Source: Royal Society of Chemistry journal article supplement (doi:10.1039/d4cc04319g), 2024-01-01
Supplement: d4cc04319g1.pdf [file d4cc04319g1.pdf]

Electronic Supplementary Information for the paper entitled:

**A Polychloride-enabled Synthesis of [NEt<sub>3</sub>Me][PCl<sub>6</sub>] Serving as a Potential PCl<sub>3</sub>-Storage and PCl<sub>5</sub>-Reagent**

Moritz J. Ernst, Merlin Kleoff, Patrick Voßnacker, Günther Thiele, Christian Müller, and Sebastian Riedel

*Freie Universität Berlin, Institute of Chemistry and Biochemistry,  
Fabeckstr. 34/36, 14195 Berlin, Germany*

*E-mail: s.riedel@fu-berlin.de, c.mueller@fu-berlin.de.*

## Table of contents

|                                                                                                                                                                                                                                                                                                                                                                                       |           |
|---------------------------------------------------------------------------------------------------------------------------------------------------------------------------------------------------------------------------------------------------------------------------------------------------------------------------------------------------------------------------------------|-----------|
| <b>Part 1: Synthetic procedures</b> .....                                                                                                                                                                                                                                                                                                                                             | <b>4</b>  |
| 1. General Information .....                                                                                                                                                                                                                                                                                                                                                          | 4         |
| 1.1. Materials .....                                                                                                                                                                                                                                                                                                                                                                  | 4         |
| 1.2. Physical Measurements.....                                                                                                                                                                                                                                                                                                                                                       | 4         |
| 1.3. Crystal Structure Determination.....                                                                                                                                                                                                                                                                                                                                             | 4         |
| 1.4. Precautions.....                                                                                                                                                                                                                                                                                                                                                                 | 4         |
| 2. Synthesis of $[\text{NEt}_3\text{Me}][\text{PCl}_6]$ from $\text{P}_4$ .....                                                                                                                                                                                                                                                                                                       | 4         |
| 3. Synthesis of $[\text{NEt}_3\text{Me}][\text{PCl}_6]$ starting from $\text{PCl}_3$ .....                                                                                                                                                                                                                                                                                            | 5         |
| 4. Synthesis of $\text{PCl}(\text{OPh})_4$ starting from $[\text{NEt}_3\text{Me}][\text{PCl}_6]$ .....                                                                                                                                                                                                                                                                                | 5         |
| 5. Synthesis of adamantyl acid chloride starting from $[\text{NEt}_3\text{Me}][\text{PCl}_6]$ .....                                                                                                                                                                                                                                                                                   | 6         |
| 6. Synthesis of hexachlorophosphazene starting from $[\text{NEt}_3\text{Me}][\text{PCl}_6]$ .....                                                                                                                                                                                                                                                                                     | 6         |
| 7. Direct synthesis of $\text{PCl}_3$ from $\text{P}_4$ and $[\text{NEt}_3\text{Me}][\text{Cl}_3]$ .....                                                                                                                                                                                                                                                                              | 6         |
| 8. Release of $\text{PCl}_3$ from $[\text{NEt}_3\text{Me}][\text{PCl}_6]$ in dichloromethane .....                                                                                                                                                                                                                                                                                    | 6         |
| <b>Part 2: Crystallographic data</b> .....                                                                                                                                                                                                                                                                                                                                            | <b>8</b>  |
| <b>Table S1.</b> Crystal data and structure determination parameters. ....                                                                                                                                                                                                                                                                                                            | 8         |
| <b>Figure S1.</b> Ellipsoid representation (50% probability) of $[\text{NEt}_3\text{Me}][\text{PCl}_6]$ .....                                                                                                                                                                                                                                                                         | 9         |
| <b>Table S2.</b> Selected bond lengths (Å) $[\text{NEt}_3\text{Me}][\text{PCl}_6]$ .....                                                                                                                                                                                                                                                                                              | 9         |
| <b>Figure S2.</b> Representation of the four different orientations of the $[\text{PCl}_6]$ anion within the molecular structure of $[\text{NEt}_3\text{Me}][\text{PCl}_6]$ . Orientation <b>A</b> has an occupation number of 0.625 while B, C and D have an occupation number of 0.125. The different geometries are shown with a viewing direction towards the (1,1,1) plane. .... | 11        |
| <b>Figure S3.</b> Color-coded superposition of the 4 different orientations of the $[\text{PCl}_6]^-$ anion within the molecular structure of $[\text{NEt}_3\text{Me}][\text{PCl}_6]$ . <b>A</b> green inner octants, <b>B</b> yellow octants, <b>C</b> red octants, <b>D</b> blue octants. ....                                                                                      | 12        |
| <b>Part 3: Spectral data</b> .....                                                                                                                                                                                                                                                                                                                                                    | <b>13</b> |
| <b>Figure S4.</b> $^{31}\text{P}$ NMR spectrum ( $\text{NCCD}_3$ ) of $[\text{NEt}_3\text{Me}][\text{PCl}_6]$ .....                                                                                                                                                                                                                                                                   | 13        |
| <b>Figure S5.</b> $^1\text{H}$ NMR spectrum ( $\text{NCCD}_3$ ) of $[\text{NEt}_3\text{Me}][\text{PCl}_6]$ .....                                                                                                                                                                                                                                                                      | 13        |
| <b>Figure S6.</b> $^{13}\text{C}\{^1\text{H}\}$ NMR spectrum ( $\text{NCCD}_3$ ) of $[\text{NEt}_3\text{Me}][\text{PCl}_6]$ .....                                                                                                                                                                                                                                                     | 14        |
| <b>Figure S7.</b> Experimental Raman spectrum of $[\text{NEt}_3\text{Me}][\text{PCl}_6]$ recorded at room temperature. ....                                                                                                                                                                                                                                                           | 14        |
| <b>Figure S8.</b> $\text{ESI}^-$ MS spectrum of $[\text{NEt}_3\text{Me}][\text{PCl}_6]$ . ....                                                                                                                                                                                                                                                                                        | 15        |
| <b>Figure S9.</b> $\text{ESI}^-$ MS spectrum (zoom) of $[\text{NEt}_3\text{Me}][\text{PCl}_6]$ . ....                                                                                                                                                                                                                                                                                 | 15        |
| <b>Figure S10.</b> $\text{ESI}^+$ MS spectrum of $[\text{NEt}_3\text{Me}][\text{PCl}_6]$ . ....                                                                                                                                                                                                                                                                                       | 16        |
| <b>Figure S11.</b> Quantitative $^{31}\text{P}$ NMR spectrum ( $\text{NCCD}_3$ ) of $[\text{NEt}_3\text{Me}][\text{PCl}_6]$ with a $\text{PPh}_3$ -capillary (19.7 $\mu\text{mol}$ ). ....                                                                                                                                                                                            | 16        |
| <b>Figure S12.</b> Quantitative $^1\text{H}$ NMR spectrum ( $\text{NCCD}_3$ ) of $[\text{NEt}_3\text{Me}][\text{PCl}_6]$ with a $\text{PPh}_3$ -capillary (19.7 $\mu\text{mol}$ ). ....                                                                                                                                                                                               | 17        |
| <b>Figure S13.</b> Quantitative $^{31}\text{P}$ NMR spectrum ( $\text{CD}_2\text{Cl}_2$ ) of the $\text{CH}_2\text{Cl}_2$ washing solution with a $\text{PPh}_3$ -capillary (19.7 $\mu\text{mol}$ ). ....                                                                                                                                                                             | 17        |
| <b>Figure S14.</b> Quantitative $^1\text{H}$ NMR spectrum ( $\text{CD}_2\text{Cl}_2$ ) of the $\text{CH}_2\text{Cl}_2$ washing solution with a $\text{PPh}_3$ -capillary (19.7 $\mu\text{mol}$ ). ....                                                                                                                                                                                | 18        |
| <b>Figure S15.</b> $^{31}\text{P}\{^1\text{H}\}$ NMR spectrum ( $\text{CD}_2\text{Cl}_2$ ) of $\text{PCl}(\text{OPh})_4$ synthesized from $[\text{NEt}_3\text{Me}][\text{PCl}_6]$ and phenol. ....                                                                                                                                                                                    | 18        |
| <b>Figure S16.</b> $^1\text{H}$ NMR spectrum ( $\text{CD}_2\text{Cl}_2$ ) of $\text{PCl}(\text{OPh})_4$ and $[\text{NEt}_3\text{Me}][\text{Cl}(\text{HCl})_n]$ synthesized from $[\text{NEt}_3\text{Me}][\text{PCl}_6]$ and phenol. ....                                                                                                                                              | 19        |
| <b>Figure S17.</b> Quantitative $^{31}\text{P}$ NMR spectrum ( $\text{CD}_2\text{Cl}_2$ ) of $\text{PCl}(\text{OPh})_4$ synthesized from $[\text{NEt}_3\text{Me}][\text{PCl}_6]$ and phenol with a $\text{PPh}_3$ -capillary (12.1 $\mu\text{mol}$ ). ....                                                                                                                            | 19        |

|                                                                                                                                                                                                                                                 |           |
|-------------------------------------------------------------------------------------------------------------------------------------------------------------------------------------------------------------------------------------------------|-----------|
| <b>Figure S18.</b> $^{31}\text{P}\{^1\text{H}\}$ NMR spectrum ( $\text{CD}_2\text{Cl}_2$ ) of $\text{POCl}_3$ synthesized from $[\text{NEt}_3\text{Me}][\text{PCl}_6]$ and adamantyl carboxylic acid.....                                       | 20        |
| <b>Figure S19.</b> $^1\text{H}$ NMR spectrum ( $\text{CD}_2\text{Cl}_2$ ) of $\text{POCl}_3$ and $[\text{NEt}_3\text{Me}][\text{Cl}(\text{HCl})_n]$ synthesized from $[\text{NEt}_3\text{Me}][\text{PCl}_6]$ and adamantyl carboxylic acid..... | 20        |
| <b>Figure S20.</b> $^{31}\text{P}\{^1\text{H}\}$ NMR spectrum ( $\text{CD}_2\text{Cl}_2$ ) of hexaphosphabenzene synthesized from $[\text{NEt}_3\text{Me}][\text{PCl}_6]$ and $\text{NH}_4\text{Cl}$ .....                                      | 21        |
| <b>Figure S21.</b> $^1\text{H}$ NMR spectrum ( $\text{CD}_2\text{Cl}_2$ ) of $[\text{NEt}_3\text{Me}][\text{Cl}(\text{HCl})_n]$ synthesized in the reaction between $[\text{NEt}_3\text{Me}][\text{PCl}_6]$ and $\text{NH}_4\text{Cl}$ .....    | 21        |
| <b>Figure S22.</b> Experimental Raman spectrum of the mixture of $[\text{NEt}_3\text{Me}][\text{PCl}_6]$ and red phosphorus recorded at room temperature.....                                                                                   | 22        |
| <b>Figure S23.</b> Experimental Raman spectrum of the isolated red phosphorus ( $\text{P}_{\text{red}}$ ) recorded at room temperature.....                                                                                                     | 22        |
| <b>Figure S24.</b> $^{31}\text{P}$ NMR spectrum (neat) of $\text{PCl}_3$ directly synthesized from $\text{P}_4$ and $[\text{NEt}_3\text{Me}][\text{Cl}_3]$ .....                                                                                | 23        |
| <b>Figure S25.</b> Experimental setup for the direct synthesis of $\text{PCl}_3$ directly from $\text{P}_4$ and $[\text{NEt}_3\text{Me}][\text{Cl}_3]$ .....                                                                                    | 23        |
| <b>Literature</b> .....                                                                                                                                                                                                                         | <b>24</b> |

# Part 1: Synthetic procedures

## 1. General Information

### 1.1. Materials

[NEt<sub>3</sub>Me][Cl<sub>3</sub>] has been prepared by the standard procedure.<sup>[1]</sup> All commercially available reagents were used as received unless mentioned otherwise. Solvents were dried over molecular sieves (3 Å) and degassed by three freeze-pump-thaw cycles. All reactions with air- and moisture-sensitive compounds were performed under an argon atmosphere using standard Schlenk techniques.

### 1.2. Physical Measurements

The NMR spectra were recorded on the following spectrometers: *JEOL ECS 400* (<sup>1</sup>H: 399.7 MHz, <sup>31</sup>P: 161.8 MHz) and *JEOL JNM-ECA400II* (<sup>1</sup>H: 400.5 MHz, <sup>31</sup>P: 162.1 MHz). The NMR samples were measured at room temperature unless otherwise stated. Chemical shifts ( $\delta$ ) are given relative to the signals of the external standards TMS (<sup>1</sup>H, <sup>13</sup>C), 85% phosphoric acid (<sup>31</sup>P). MestReNova 14.1.1 was used to process the NMR spectra.<sup>[2]</sup> Electrospray ionization mass spectrometry (ESI-MS) was carried out with the ESI-MSD TOF unit of an *Agilent 6210 TOF LC/MS* system. The measurements were performed in acetonitrile. Raman spectra were recorded at room temperature on a Bruker MultiRAM II equipped with a low-temperature Ge detector (1064 nm, up to 450 mW, resolution 4 cm<sup>-1</sup>).

### 1.3. Crystal Structure Determination

Single crystal X-ray diffraction data were collected on a *Bruker D8 Venture* with Mo K $\alpha$  radiation. Absorption corrections were carried out by the multiscan method.<sup>[3,4]</sup> Structure solution and refinement were performed with the SHELX program package.<sup>[5,6]</sup> The representation of molecular structures was done using the program DIAMOND 4.2.2<sup>[7]</sup> Some remaining crystallographic problems are commented on in the respective *.cif* file.

### 1.4. Precautions

White phosphorus is toxic and extremely pyrophoric. Special safety precautions must be considered: work in pairs, available and ready to use fire extinguisher and sand. Traces of white phosphorus can be quenched by an aqueous CuSO<sub>4</sub> solution.

[NEt<sub>3</sub>Me][Cl<sub>3</sub>] releases chlorine in contact with water. Traces of the ionic liquid are quenched with Na<sub>2</sub>S<sub>2</sub>O<sub>3</sub> solution. Teflon cannulas are used to avoid reactions with metal of cannulas. Avoid contact of [NEt<sub>3</sub>Me][Cl<sub>3</sub>] with acetone, as this could react to chloroacetone.

## 2. Synthesis of [NEt<sub>3</sub>Me][PCl<sub>6</sub>] from P<sub>4</sub>

**Method A:** 988 mg (4.44 mmol, 5 equiv., 817  $\mu$ L) [NEt<sub>3</sub>Me][Cl(Cl<sub>2</sub>)] was added to a suspension of 55 mg (444  $\mu$ mol, 0.5 equiv.) P<sub>4</sub> in 15 mL CH<sub>2</sub>Cl<sub>2</sub> at -20 °C. While warming up to room temperature a colourless suspension was obtained which was stirred overnight. The suspension was filtered in the cold and the residue was washed two times with cold CH<sub>2</sub>Cl<sub>2</sub> to remove the [NEt<sub>3</sub>Me][Cl]. After drying the residue in vacuum, a colourless powder of [NEt<sub>3</sub>Me][PCl<sub>6</sub>] is obtained. Yield: 59% (375 mg, 1.04 mmol, based on P<sub>4</sub>). Single crystals of [NEt<sub>3</sub>Me][PCl<sub>6</sub>] suitable for X-ray diffraction were obtained from a concentrated solution in CH<sub>2</sub>Cl<sub>2</sub> within several days by slowly cooling to -20 °C.

<sup>31</sup>P NMR (CD<sub>3</sub>CN, rt): -297.7 ppm (s).<sup>Fig. S2</sup>

<sup>1</sup>H NMR (CD<sub>3</sub>CN, rt): 3.23 (q, <sup>3</sup>J<sub>HH</sub> = 7.29 Hz, 6H, (H<sub>3</sub>C)N(CH<sub>2</sub>CH<sub>3</sub>)), 2.84 (s, 3H, (H<sub>3</sub>C)N(CH<sub>2</sub>CH<sub>3</sub>)), 1.25 ppm (tt, <sup>3</sup>J<sub>HH</sub> = 7.29 Hz, <sup>3</sup>J<sub>NH</sub> = 1.98 Hz, 9H, (H<sub>3</sub>C)N(CH<sub>2</sub>CH<sub>3</sub>)).<sup>Fig. S3</sup>

**$^{13}\text{C}\{^1\text{H}\}$  NMR ( $\text{CD}_3\text{CN}$ , rt):** 56.6 (s, 3C,  $(\text{H}_3\text{C})\text{N}(\text{CH}_2\text{CH}_3)$ ), 47.4 (s, 1C,  $(\text{H}_3\text{C})\text{N}(\text{CH}_2\text{CH}_3)$ ), 8.1 ppm (s, 3C,  $(\text{H}_3\text{C})\text{N}(\text{CH}_2\text{CH}_3)$ ).<sup>Fig. S4</sup>

**Raman (rt):**  $\tilde{\nu}$  = 2989 (m), 2951 (m), 1458 (w), 685 (m), 360 (vs), 283 (s), 239  $\text{cm}^{-1}$  (m).<sup>Fig. S5</sup>

**ESI-TOF (negative mode):**  $m/z$  = 132.8924 ( $\text{PCl}_2\text{O}_2^-$ , calculated: 132.90131).<sup>Fig. S6</sup> The molecular ion peak of  $[\text{PCl}_6]^-$  is not observed due to the moisture and air sensitivity of the compound. Therefore, only the molecular ion peaks for oxidation products are observed.

#### Quantitative NMR:

Due to the high sensitivity towards air and moisture, no CHN-elemental analysis could be performed. The composition of  $[\text{NEt}_3\text{Me}][\text{PCl}_6]$  is shown by quantitative NMR with a calibrated  $\text{PPh}_3$ -capillary (19.7  $\mu\text{mol}$ ) (Figure S9/S10). 32.8 mg of  $[\text{NEt}_3\text{Me}][\text{PCl}_6]$  are dissolved in 0.65 mL  $\text{CD}_3\text{CN}$  and the capillary is added. Integration of the  $^{31}\text{P}$  NMR (relaxation delay 60 s) gives the ratio 1 : 4.50 for  $\text{PPh}_3$  :  $[\text{PCl}_6]^-$  resulting in 88.9  $\mu\text{mol}$  (21.7 mg)  $[\text{PCl}_6]^-$ . Integration of the  $^1\text{H}$  NMR gives the ratio 15 : 14.12 for  $\text{P}(\text{C}_6\text{H}_5)_3$  :  $[(\text{H}_3\text{C})\text{N}(\text{CH}_2\text{CH}_3)]^+$  resulting in 92.8  $\mu\text{mol}$  (10.8 mg)  $[\text{NEt}_3\text{Me}]^+$ . The product is therefore contaminated with 3.95  $\mu\text{mol}$  of  $[\text{Cl}]^-$  (140  $\mu\text{g}$ ) yielding a purity of  $[\text{NEt}_3\text{Me}][\text{PCl}_6]$  of 96%.

**Method B:** 593 mg (2.66 mmol, 5 equiv., 0.49 mL)  $[\text{NEt}_3\text{Me}][\text{Cl}(\text{Cl}_2)]$  was added to a suspension of 33 mg (266  $\mu\text{mol}$ , 0.5 equiv.)  $\text{P}_4$  in 15 mL  $\text{CH}_2\text{Cl}_2$  at  $-20^\circ\text{C}$ . While warming up to room temperature a colourless suspension was obtained which was stirred overnight. The suspension was concentrated to 3 mL and pentane (15 mL) was added to complete the precipitation of the product. After filtration, the residue was dried in vacuum and a colourless powder of the molar composition  $[\text{NEt}_3\text{Me}]_5[\text{PCl}_6]_2[\text{Cl}]_3$  is obtained. Yield: 92% (577 mg, 532  $\mu\text{mol}$ , based on  $\text{P}_4$ ). This method can be used for further reactions of  $[\text{NEt}_3\text{Me}][\text{PCl}_6]$  due to the higher yield and no hindrance of the reactivity by the  $\text{Cl}^-$ -anions.

### 3. Synthesis of $[\text{NEt}_3\text{Me}][\text{PCl}_6]$ starting from $\text{PCl}_3$

673 mg (3.02 mmol, 1 equiv., 0.56 mL)  $[\text{NEt}_3\text{Me}][\text{Cl}(\text{Cl}_2)]$  was added to a solution of 415 mg (3.02 mmol, 1 equiv.)  $\text{PCl}_3$  in 8 mL  $\text{CH}_2\text{Cl}_2$  at room temperature. After stirring for 72 h at rt all volatile substances were removed. The residue was dried in vacuum and  $[\text{NEt}_3\text{Me}][\text{PCl}_6]$  was obtained as a colourless powder. Yield: 57% (617 mg, 1.71 mmol).

### 4. Synthesis of $\text{PCl}(\text{OPh})_4$ starting from $[\text{NEt}_3\text{Me}][\text{PCl}_6]$

20.0 mg (55.6  $\mu\text{mol}$ , 1 equiv.)  $[\text{NEt}_3\text{Me}][\text{PCl}_6]$  and 20.9 mg (222  $\mu\text{mol}$ , 5 equiv.) phenol were dissolved in 0.7 mL  $\text{CD}_2\text{Cl}_2$  at room temperature. Directly after the addition the  $^{31}\text{P}\{^1\text{H}\}$  and  $^1\text{H}$  NMR measurements show full conversion of the starting materials. After removing all volatiles,  $\text{PCl}(\text{OPh})_4$  is separated from the formed ionic liquid  $[\text{NEt}_3\text{Me}][\text{Cl}(\text{HCl})_n]$  by extraction with pentane. Subsequent removal of all volatiles from the extract afforded a colourless solid. The NMR shifts match with the reporting literature.<sup>[8,9]</sup>

#### $\text{PCl}(\text{OPh})_4$ :

**$^{31}\text{P}\{^1\text{H}\}$  NMR ( $\text{CD}_2\text{Cl}_2$ , rt):** -23.7 ppm (s).<sup>Fig. S13</sup>

**$^1\text{H}$  NMR ( $\text{CD}_2\text{Cl}_2$ , rt):** 7.57 – 7.54 (m, 8H,  $(\text{PCl}(\text{OC}_6\text{H}_5))$ ), 7.51 – 7.47 (m, 4H,  $(\text{PCl}(\text{OC}_6\text{H}_5))$ ), 7.28 – 7.26 ppm (m, 8H,  $(\text{PCl}(\text{OC}_6\text{H}_5))$ ).<sup>Fig. S14</sup>

#### $[\text{NEt}_3\text{Me}][\text{Cl}(\text{HCl})_n]$ :

**$^1\text{H}$  NMR ( $\text{CD}_2\text{Cl}_2$ , rt):** 11.44 (s, 1.5H,  $[\text{Cl}(\text{HCl})_{1.5}]^-$ ), 3.40 (q,  $^3J_{\text{HH}} = 7.28$  Hz, 6H,  $(\text{H}_3\text{C})\text{N}(\text{CH}_2\text{CH}_3)$ ), 3.03 (s, 3H,  $(\text{H}_3\text{C})\text{N}(\text{CH}_2\text{CH}_3)$ ), 1.36 ppm (tt,  $^3J_{\text{HH}} = 7.28$  Hz,  $^3J_{\text{NH}} = 1.93$  Hz, 9H,  $(\text{H}_3\text{C})\text{N}(\text{CH}_2\text{CH}_3)$ ).<sup>Fig. S14</sup>

## 5. Synthesis of adamantyl acid chloride starting from [NEt<sub>3</sub>Me][PCl<sub>6</sub>]

30 mg (83.4 μmol, 1 equiv.) [NEt<sub>3</sub>Me][PCl<sub>6</sub>] and 15.0 mg (83.4 μmol, 1 equiv.) adamantyl carbonyl acid were dissolved in 0.7 mL CDCl<sub>3</sub> at room temperature. Directly after the addition the <sup>31</sup>P{<sup>1</sup>H} and <sup>1</sup>H NMR measurements show full conversion of the starting materials. The NMR shifts match with the reporting literature.<sup>[9,10]</sup>

**POCl<sub>3</sub>:**

<sup>31</sup>P{<sup>1</sup>H} NMR (CDCl<sub>3</sub>, rt): -4.7 ppm (s).<sup>Fig. S16</sup>

**AdC(O)Cl:**

<sup>1</sup>H NMR (CDCl<sub>3</sub>, rt): 2.02 (m, 3H, C<sub>tert</sub>), 1.91 (m, 6H, C<sub>sec</sub>), 1.65 ppm (m, 6H, C<sub>sec</sub>).<sup>Fig. S17</sup>

**[NEt<sub>3</sub>Me](Cl(HCl)<sub>n</sub>):**

<sup>1</sup>H NMR (CDCl<sub>3</sub>, rt): 12.63 (s, 0.5H, [Cl(HCl)<sub>0.5</sub>]<sup>-</sup>), 3.48 (q, <sup>3</sup>J<sub>HH</sub> = 7.30 Hz, 6H, (H<sub>3</sub>C)N(CH<sub>2</sub>CH<sub>3</sub>)), 3.11 (s, 3H, (H<sub>3</sub>C)N(CH<sub>2</sub>CH<sub>3</sub>)), 1.32 ppm (t, <sup>3</sup>J<sub>HH</sub> = 7.16 Hz, 9H, (H<sub>3</sub>C)N(CH<sub>2</sub>CH<sub>3</sub>)).<sup>Fig. S17</sup>

## 6. Synthesis of hexachlorophosphazene starting from [NEt<sub>3</sub>Me][PCl<sub>6</sub>]

138 mg (385 μmol, 3 equiv.) [NEt<sub>3</sub>Me][PCl<sub>6</sub>] and 20.6 mg (385 μmol, 3 equiv.) ammonium chloride were suspended in 8 mL chlorobenzene and heated under reflux for 2 hours. After removing all volatiles, the hexachlorophosphazene can be separated from the ionic liquid [NEt<sub>3</sub>Me](Cl(HCl)<sub>n</sub>) by extraction with pentane and subsequent removal of all volatiles as colourless solid. The NMR shifts match with the reporting literature.<sup>[9,11]</sup>

**(N=PCl<sub>2</sub>)<sub>3</sub>:**

<sup>31</sup>P{<sup>1</sup>H} NMR (CDCl<sub>3</sub>, rt): 20.0 ppm (s).<sup>Fig. S18</sup>

**[NEt<sub>3</sub>Me](Cl(HCl)<sub>n</sub>):**

<sup>1</sup>H NMR (CDCl<sub>3</sub>, rt): 12.83 (s, 0.6H, [Cl(HCl)<sub>0.6</sub>]<sup>-</sup>), 3.37 (q, <sup>3</sup>J<sub>HH</sub> = 7.29 Hz, 6H, (H<sub>3</sub>C)N(CH<sub>2</sub>CH<sub>3</sub>)), 3.01 (s, 3H, (H<sub>3</sub>C)N(CH<sub>2</sub>CH<sub>3</sub>)), 1.24 ppm (t, <sup>3</sup>J<sub>HH</sub> = 7.21 Hz, 9H, (H<sub>3</sub>C)N(CH<sub>2</sub>CH<sub>3</sub>)).<sup>Fig. S19</sup>

## 7. Direct synthesis of PCl<sub>3</sub> from P<sub>4</sub> and [NEt<sub>3</sub>Me][Cl<sub>3</sub>]

7.81 g (30.3 mmol, 1 equiv., 6.46 μL) [NEt<sub>3</sub>Me][Cl(Cl<sub>2</sub>)<sub>1.5</sub>] and 938 mg (7.57 mmol, 0.25 equiv.) P<sub>4</sub> are mixed at -20 °C. The suspension is heated in a 120 °C oil bath and PCl<sub>3</sub> collected during the reaction by trap-to-trap condensation at 10<sup>-3</sup> mbar (reaction setup see: Fig. S23) Yield: 74% (3.07 g, 22.3 mmol, based on P<sub>4</sub>).

**PCl<sub>3</sub>:**

<sup>31</sup>P{<sup>1</sup>H} NMR (neat, rt): 217.6 ppm (s).<sup>Fig. S22</sup>

## 8. Release of PCl<sub>3</sub> from [NEt<sub>3</sub>Me][PCl<sub>6</sub>] in dichloromethane

2.13 g (6.42 μmol) [NEt<sub>3</sub>Me][PCl<sub>6</sub>] are suspended in 25 mL CH<sub>2</sub>Cl<sub>2</sub> and the reaction mixture is heated to reflux for 2.5 hours. The resulting orange suspension is cooled down to room temperature. Afterwards, the formed PCl<sub>3</sub> along with CH<sub>2</sub>Cl<sub>2</sub> are separated from the residue by trap-to-trap condensation. PCl<sub>3</sub> forms azeotropic mixtures with chlorinated solvents (CHCl<sub>3</sub>, CH<sub>2</sub>Cl<sub>2</sub>, C<sub>2</sub>H<sub>4</sub>Cl<sub>2</sub>). PCl<sub>3</sub> is received in a yield of 50% (443 mg, 3.23 mmol, determined by quantitative <sup>31</sup>P NMR) as a stock-solution in CH<sub>2</sub>Cl<sub>2</sub>. To obtain pure PCl<sub>3</sub> from [NEt<sub>3</sub>Me][PCl<sub>6</sub>], the reaction can be performed neat starting from P<sub>4</sub> (see 8.). The orange solid after condensation contains [NEt<sub>3</sub>Me][Cl] and red phosphorus (P<sub>red</sub>).<sup>Fig. S20</sup> By washing with CH<sub>2</sub>Cl<sub>2</sub>

$P_{\text{red}}$  is separated and analysed by Raman spectroscopy which matches with the reporting literature.<sup>[12]</sup>

**$P_{\text{red}}$ :**

**Raman (rt):**  $\tilde{\nu} = 599$  (m), 503 (m), 456 (w), 384 (s), 356 (s), 213  $\text{cm}^{-1}$  (w). Fig. S21

## Part 2: Crystallographic data

**Table S1.** Crystal data and structure determination parameters.

|                                             | [NEt <sub>3</sub> Me][PCl <sub>6</sub> ]                    |
|---------------------------------------------|-------------------------------------------------------------|
| Empirical formula                           | C <sub>7</sub> Cl <sub>6</sub> NP                           |
| Formula weight                              | 341.75                                                      |
| Temperature/K                               | 100                                                         |
| Crystal system                              | cubic                                                       |
| Space group                                 | Pm-3m                                                       |
| a/Å                                         | 7.2009(9)                                                   |
| b/Å                                         | 7.2009(9)                                                   |
| c/Å                                         | 7.2009(9)                                                   |
| α/°                                         | 90                                                          |
| β/°                                         | 90                                                          |
| γ/°                                         | 90                                                          |
| Volume/Å <sup>3</sup>                       | 373.4(1)                                                    |
| Z                                           | 1                                                           |
| ρ <sub>calc</sub> /g cm <sup>-3</sup>       | 1.520                                                       |
| μ/mm <sup>-1</sup>                          | 1.226                                                       |
| F(000)                                      | 166                                                         |
| Crystal size/mm <sup>3</sup>                | 0.256 × 0.114 × 0.093                                       |
| Radiation                                   | Mo K <sub>α</sub> (λ = 0.71073)                             |
| Θ range for data collection/°               | 5.658 to 49.878                                             |
| Index ranges                                | -8 ≤ h ≤ 8, -7 ≤ k ≤ 8, -8 ≤ l ≤ 8                          |
| Reflections collected                       | 3228                                                        |
| Independent reflections                     | 95 [R <sub>int</sub> = 0.0690, R <sub>sigma</sub> = 0.0128] |
| Data/restraints/parameters                  | 95/0/17                                                     |
| Goodness-of-fit on F <sup>2</sup>           | 1.233                                                       |
| Final R indexes [I >= 2σ (I)]               | R <sub>1</sub> = 0.0552, wR <sub>2</sub> = 0.1497           |
| Final R indexes [all data]                  | R <sub>1</sub> = 0.0663, wR <sub>2</sub> = 0.1698           |
| Largest diff. peak/hole / e Å <sup>-3</sup> | 0.31/-0.41                                                  |
| Diffractometer                              | Bruker D8 Venture                                           |
| CCDC access code                            | 2379260                                                     |



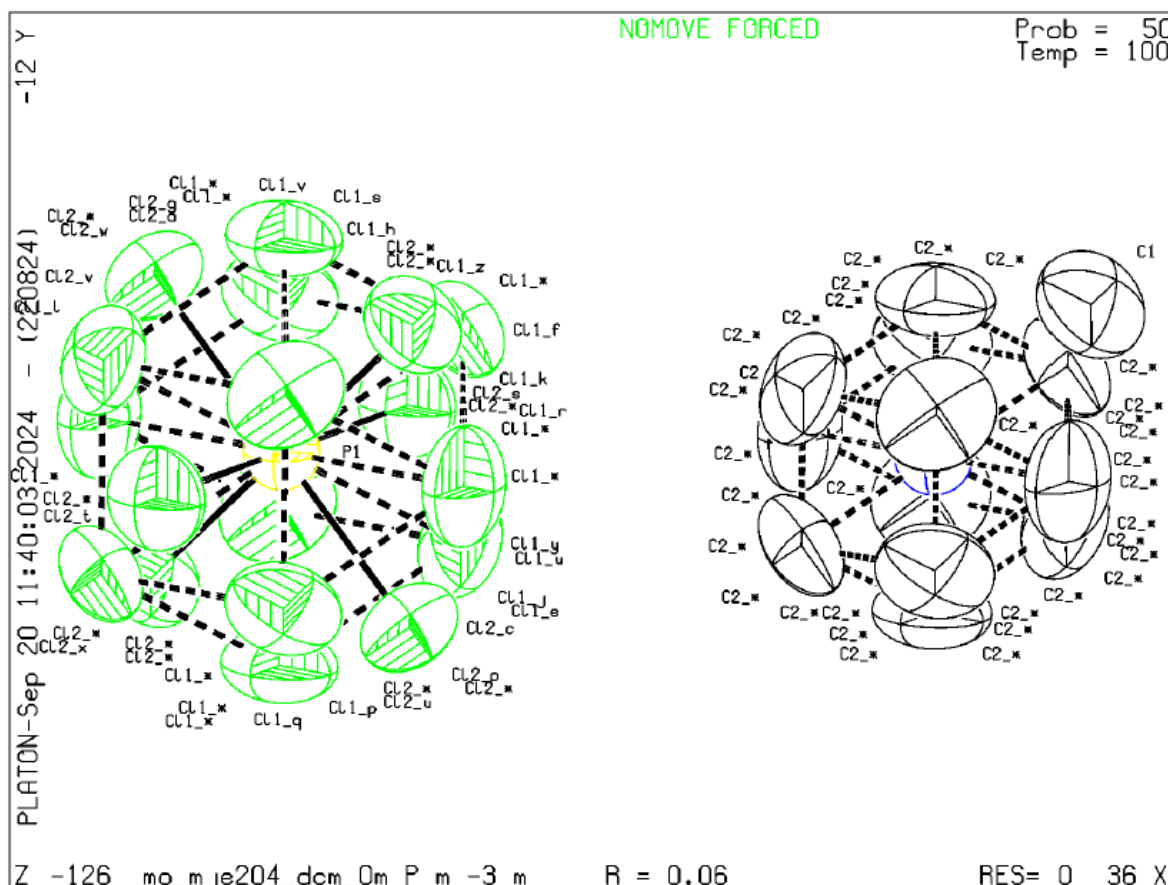

**Figure S1.** Ellipsoid representation (50% probability) of  $[\text{NET}_3\text{Me}][\text{PCl}_6]$ .

**Table S2.** Selected bond lengths (Å)  $[\text{NET}_3\text{Me}][\text{PCl}_6]$ .

|         |          |
|---------|----------|
| Cl1-Cl1 | 2.11(2)  |
| Cl1-P1  | 2.11(2)  |
| Cl2-P1  | 2.119(3) |
| N1-C2   | 1.55(2)  |
| C1-C2   | 1.81(2)  |

### Explanation of the refinement of the structure of $[\text{NET}_3\text{Me}][\text{PCl}_6]$

Within the molecular structure of  $[\text{NET}_3\text{Me}][\text{PCl}_6]$  both the anion and the cation are heavily disordered. Whilst the cation disorder is a well-documented phenomenon, the anion disorder is most likely caused by very low intermolecular interactions. The comparably large sizes of anion and cation, in combination with a very delocalized charge of the anion, results in a pseudo-binary CsCl type packing that is only caused by coulombic interactions without preferential orientation of the anion.

No twinning was found. Neither reciprocal space analysis, nor LEPAGE, nor attempts for manual twin law refinements were successful and the list of most disagreeable reflections does not indicate a wrong refinement model. We have remeasured further crystals with Cu radiation, however, no improvement on the refinement could be obtained – most likely due to the generally observed low crystal quality.

With regard to the  $[\text{NEt}_3\text{Me}]^+$  cation, the statistical disorder of ethyl and methyl fragments, superimposed by the  $(\text{CH}_2)$  and  $(\text{CH}_3)$  carbon disorder renders any H-treatment purely cosmetic. Therefore, hydrogen atoms were not treated in the structure solution.

The anion has not been treated with individual part assignment as the refinement is not stable upon assigning PART -1 to Cl1. Manual change of the Cl1 position from Wyckoff 12j and subsequent part assignment yields stable refinement and proper part assignment, however, the associated model contains 36 positions of Cl1. Since no physical meaning can be attributed to such an (anisotropic) model, we omitted the part assignment and employed the presented refinement.

### Consideration of the disorder of the $[\text{PCl}_6]^-$ anion

Within the molecular structure of  $[\text{NEt}_3\text{Me}][\text{PCl}_6]$  there are only two symmetry inequivalent Cl positions (Cl1 and Cl2). Due to the symmetry of the crystal system there is a total of 18 different Cl positions in the unit cell (12 times Cl1 and 6 times Cl2). These 18 Cl positions result in 4 different orientations for the  $[\text{PCl}_6]^-$  anions. Within the main orientation (Figure S2 A) the 6 Cl2 positions are occupied with an occupation number of 0.625. The other three orientations (Figure S2 B,C,D) consist of 4 Cl1 and 2 Cl2 atoms with an occupation number of 0.125 each. This results in a total occupation number of 0.75 for Cl2 and 0.125 for Cl1. A representation of the color-coded superposition of the four different orientations is shown in Figure S3. For all different orientations only  $90^\circ$  Cl-P-Cl angles and equal P-Cl distances ( $R(\text{P1-Cl1}) = 2.11(2) \text{ \AA}$ ,  $R(\text{P1-Cl2}) = 2.119(3) \text{ \AA}$ ), within the margin of error, resulting in an octahedral geometry.

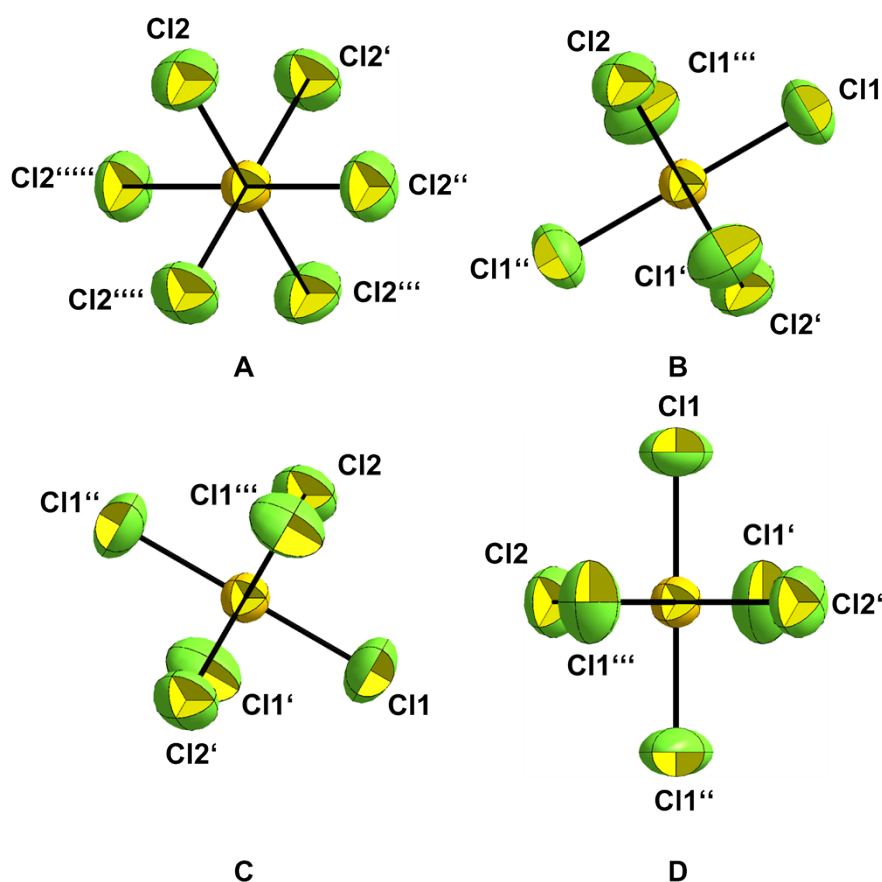

**Figure S2.** Representation of the four different orientations of the  $[\text{PCl}_6]^-$  anion within the molecular structure of  $[\text{NEt}_3\text{Me}][\text{PCl}_6]$ . Orientation A has an occupation number of 0.625 while B, C and D have an occupation number of 0.125. The different geometries are shown with a viewing direction towards the (1,1,1) plane.

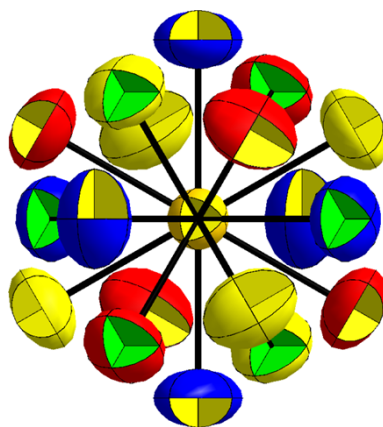

**Figure S3.** Color-coded superposition of the 4 different orientations of the  $[\text{PCl}_6]^-$  anion within the molecular structure of  $[\text{NEt}_3\text{Me}][\text{PCl}_6]$ . **A** green inner octants, **B** yellow octants, **C** red octants, **D** blue octants.

### Part 3: Spectral data

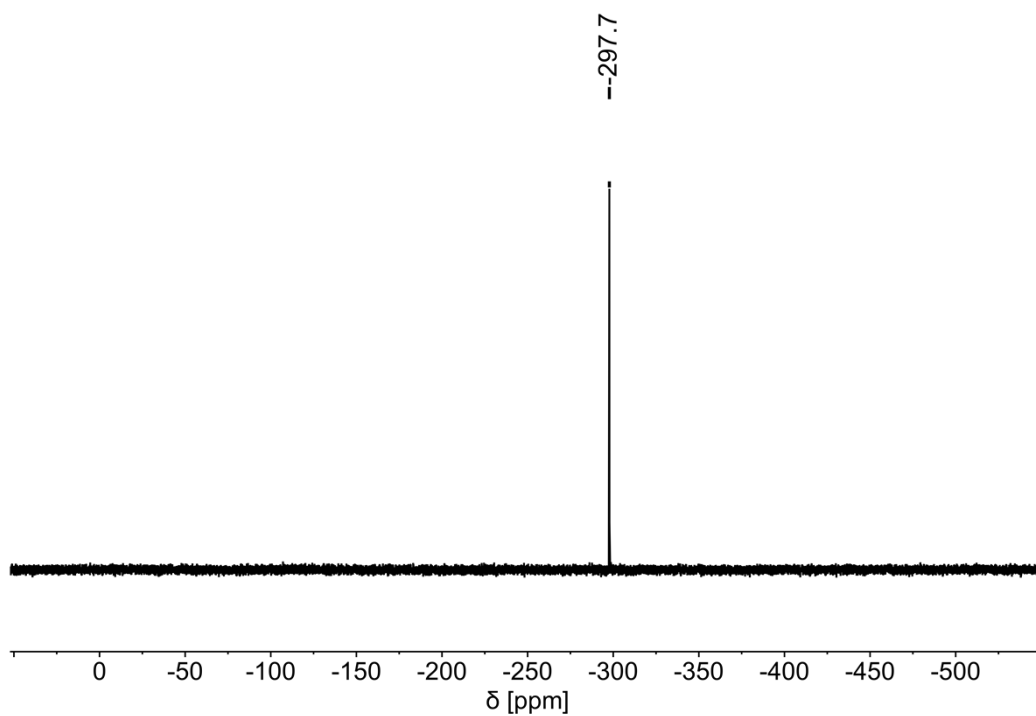

**Figure S4.** <sup>31</sup>P NMR spectrum (NCCD<sub>3</sub>) of [NEt<sub>3</sub>Me][PCl<sub>6</sub>].

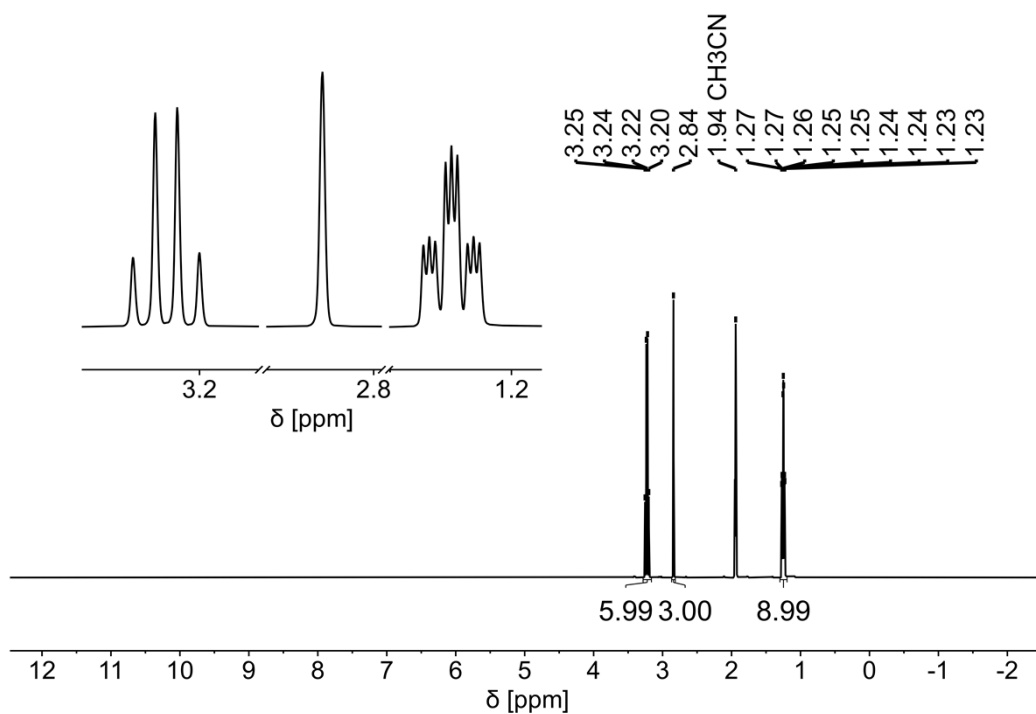

**Figure S5.** <sup>1</sup>H NMR spectrum (NCCD<sub>3</sub>) of [NEt<sub>3</sub>Me][PCl<sub>6</sub>].

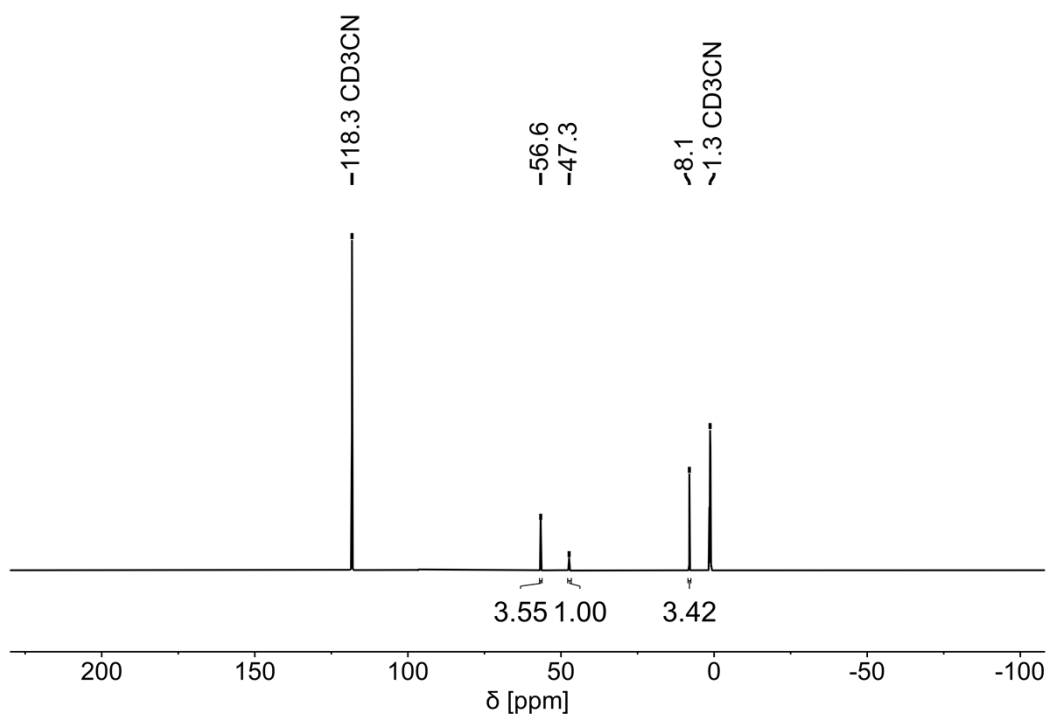

**Figure S6.**  $^{13}\text{C}\{^1\text{H}\}$  NMR spectrum ( $\text{NCCD}_3$ ) of  $[\text{NEt}_3\text{Me}][\text{PCl}_6]$ .

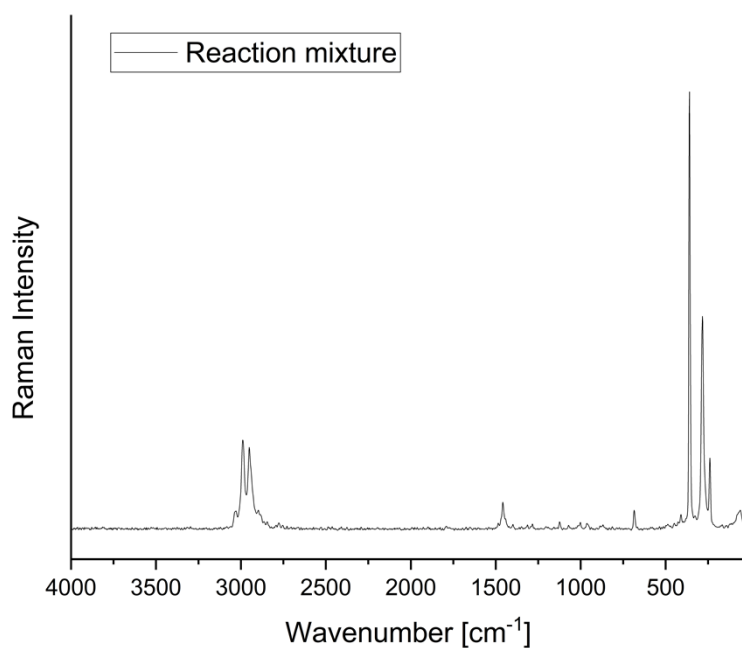

**Figure S7.** Experimental Raman spectrum of  $[\text{NEt}_3\text{Me}][\text{PCl}_6]$  recorded at room temperature.

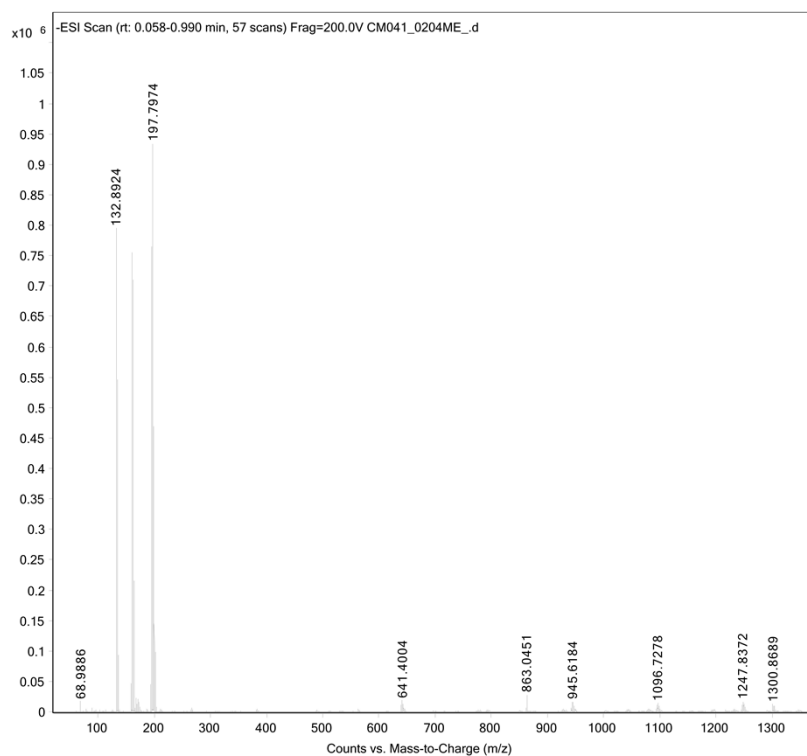

**Figure S8.** ESI<sup>-</sup> MS spectrum of [NEt<sub>3</sub>Me][PCl<sub>6</sub>].

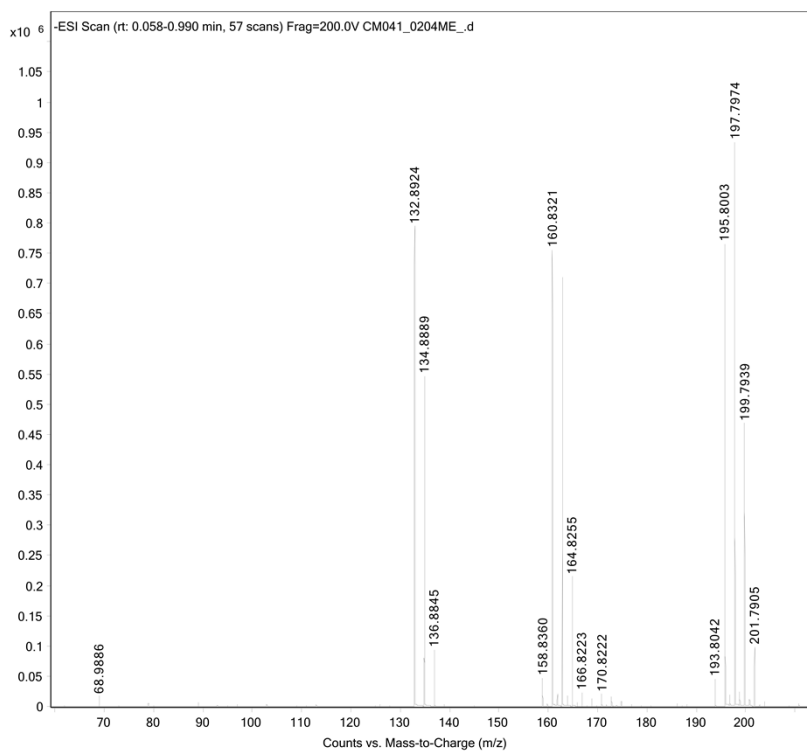

**Figure S9.** ESI<sup>-</sup> MS spectrum (zoom) of [NEt<sub>3</sub>Me][PCl<sub>6</sub>].

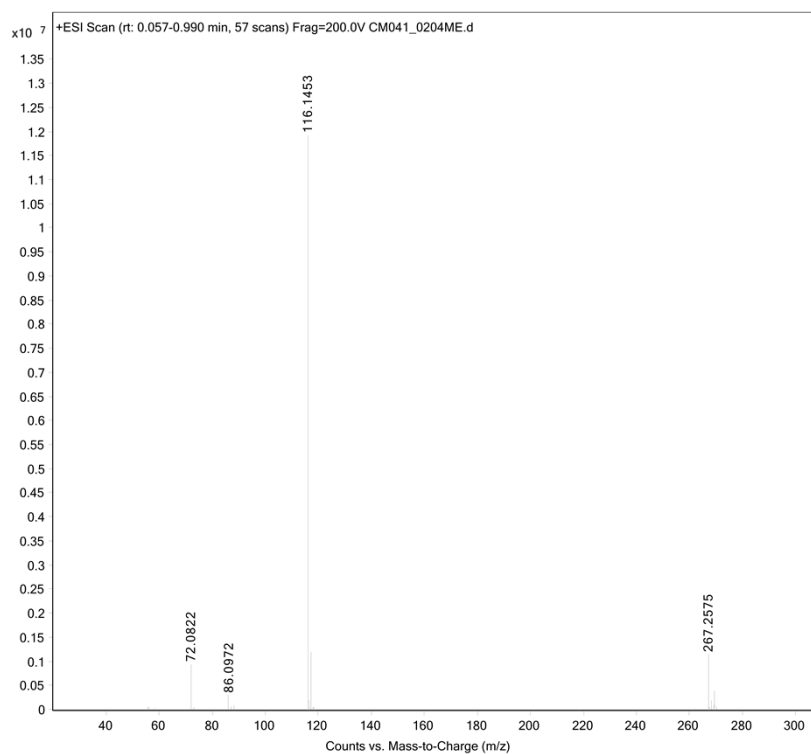

**Figure S10.** ESI<sup>+</sup> MS spectrum of [NEt<sub>3</sub>Me][PCl<sub>6</sub>].

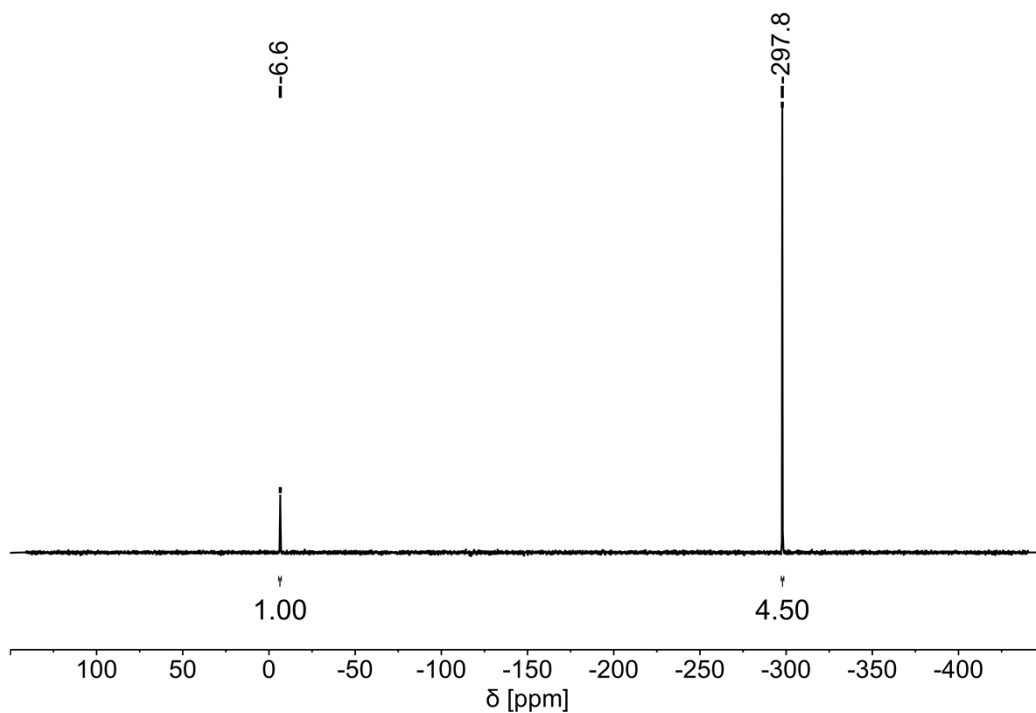

**Figure S11.** Quantitative <sup>31</sup>P NMR spectrum (NCCD<sub>3</sub>) of [NEt<sub>3</sub>Me][PCl<sub>6</sub>] with a PPh<sub>3</sub>-capillary (19.7 μmol).



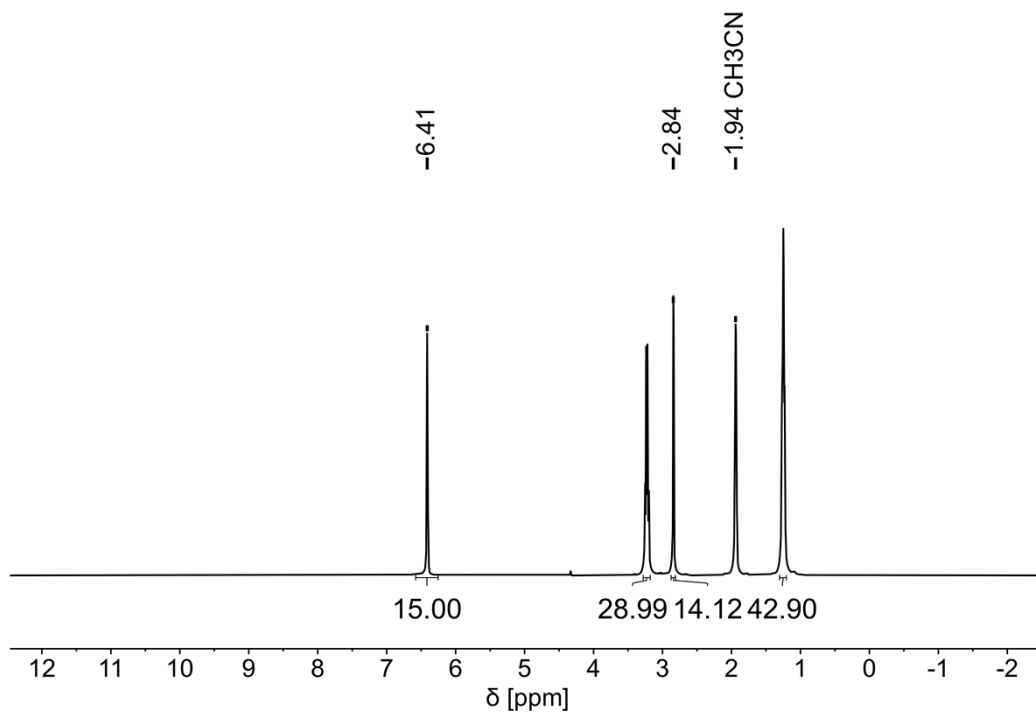

**Figure S12.** Quantitative  $^1\text{H}$  NMR spectrum (NCCD<sub>3</sub>) of [NEt<sub>3</sub>Me][PCl<sub>6</sub>] with a PPh<sub>3</sub>-capillary (19.7  $\mu\text{mol}$ ).

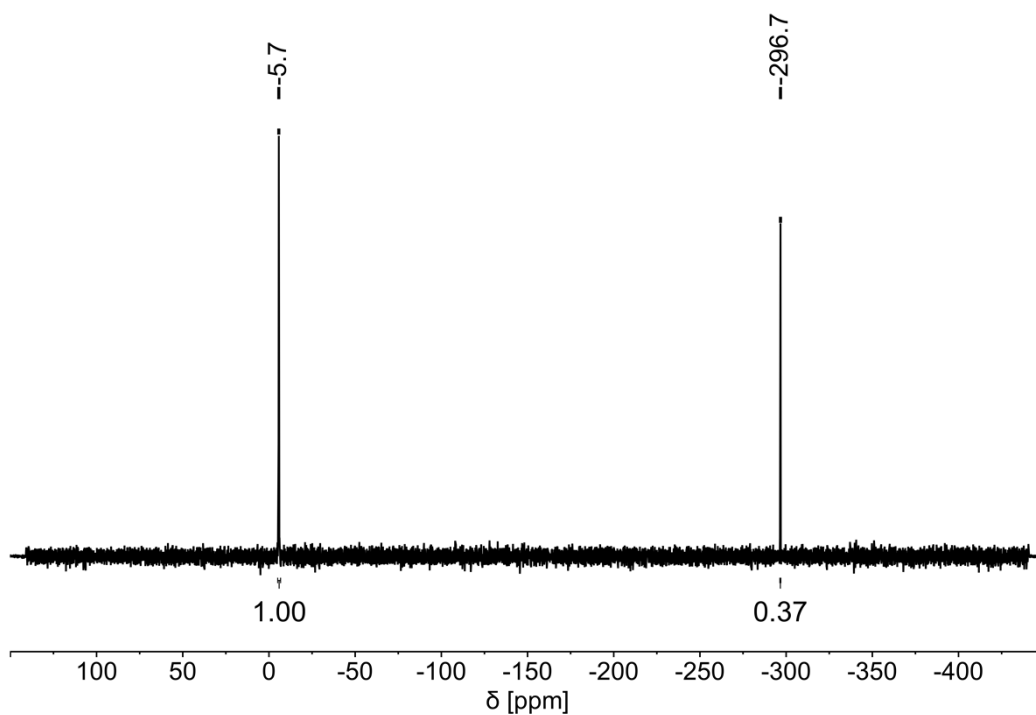

**Figure S13.** Quantitative  $^{31}\text{P}$  NMR spectrum (CD<sub>2</sub>Cl<sub>2</sub>) of the CH<sub>2</sub>Cl<sub>2</sub> washing solution with a PPh<sub>3</sub>-capillary (19.7  $\mu\text{mol}$ ).

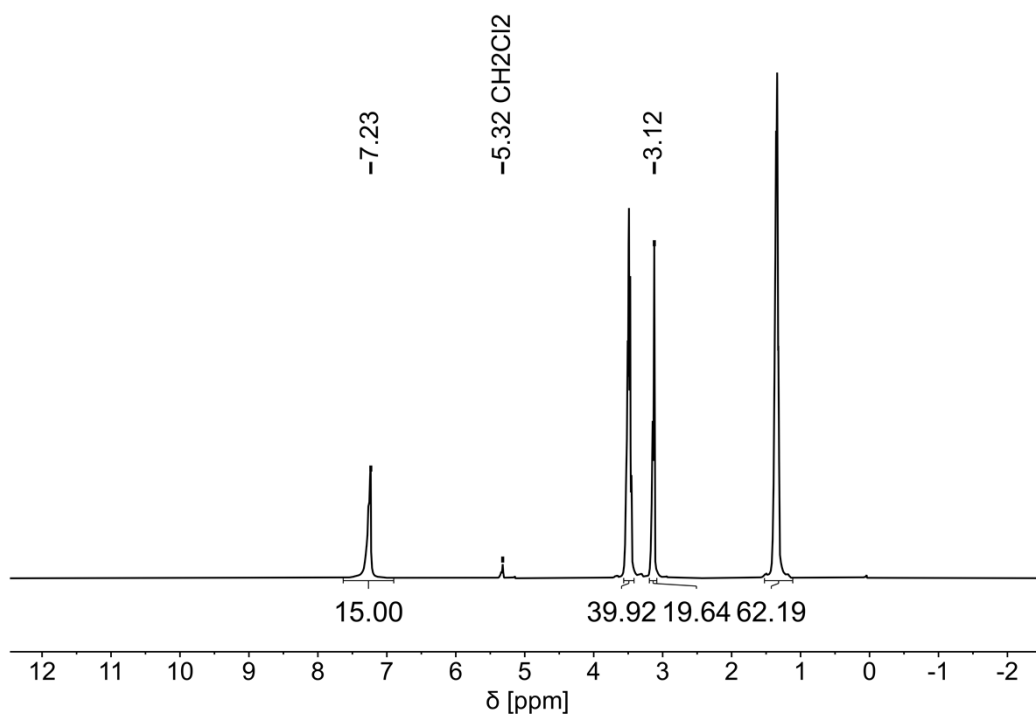

**Figure S14.** Quantitative  $^1\text{H}$  NMR spectrum ( $\text{CD}_2\text{Cl}_2$ ) of the  $\text{CH}_2\text{Cl}_2$  washing solution with a  $\text{PPh}_3$ -capillary ( $19.7 \mu\text{mol}$ ).

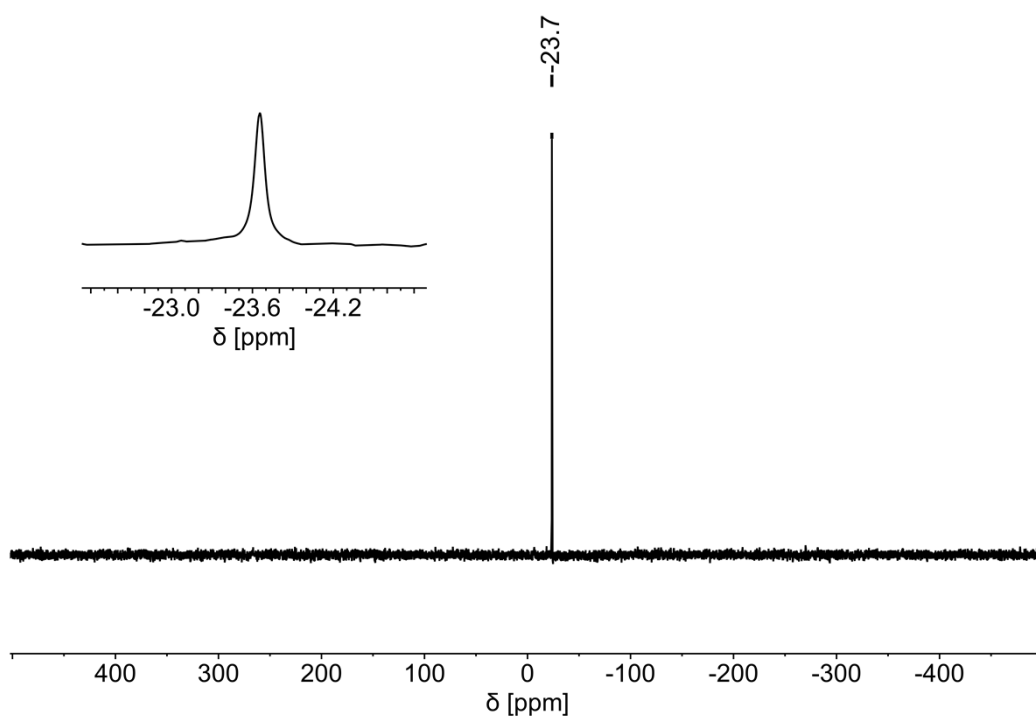

**Figure S15.**  $^{31}\text{P}\{^1\text{H}\}$  NMR spectrum ( $\text{CD}_2\text{Cl}_2$ ) of  $\text{PCI}(\text{OPh})_4$  synthesized from  $[\text{NEt}_3\text{Me}][\text{PCl}_6]$  and phenol.

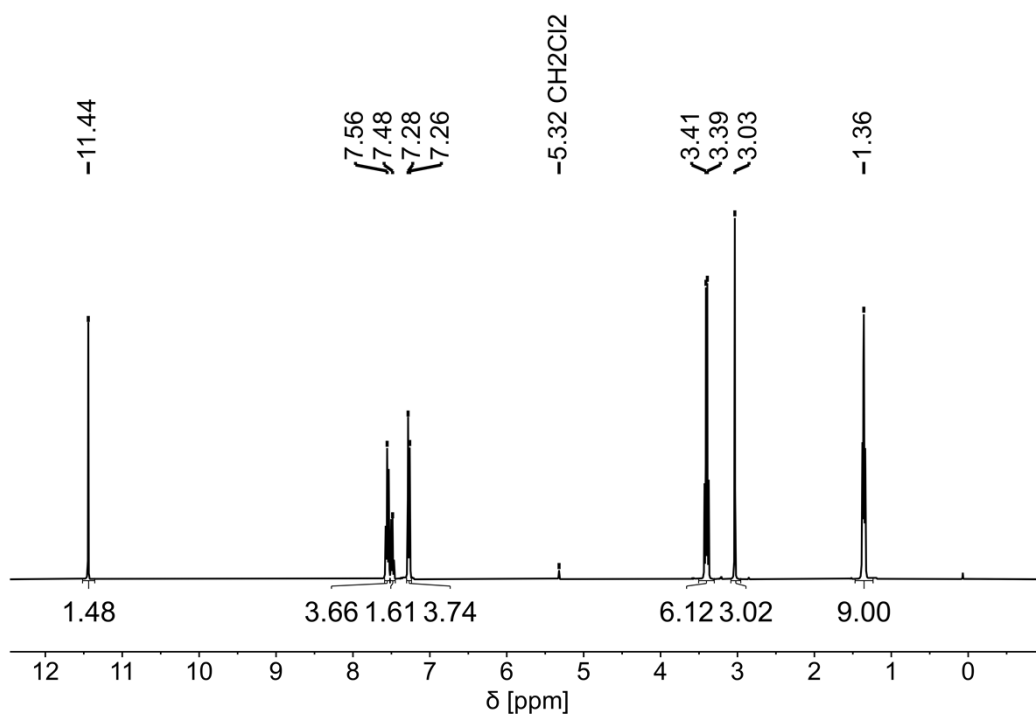

**Figure S16.** <sup>1</sup>H NMR spectrum (CD<sub>2</sub>Cl<sub>2</sub>) of PCI(OPh)<sub>4</sub> and [NEt<sub>3</sub>Me](Cl(HCl)<sub>n</sub>) synthesized from [NEt<sub>3</sub>Me][PCI<sub>6</sub>] and phenol.

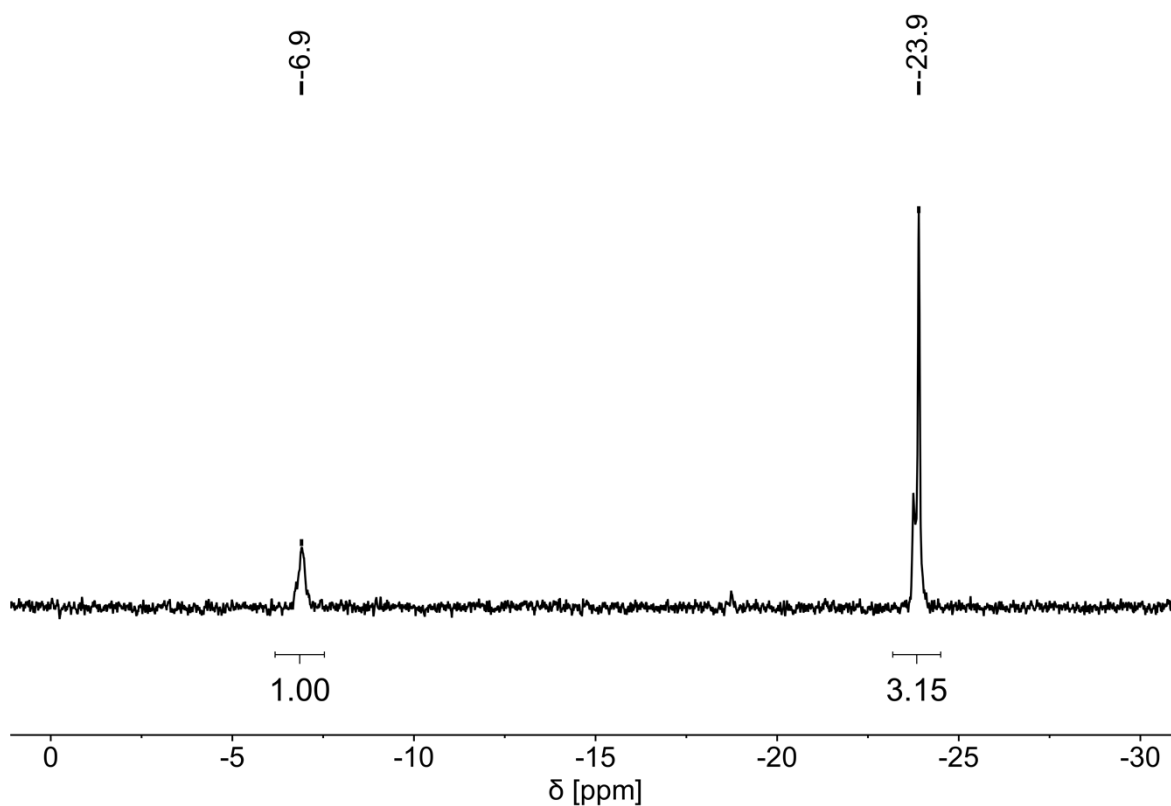

**Figure S17.** Quantitative <sup>31</sup>P NMR spectrum (CD<sub>2</sub>Cl<sub>2</sub>) of PCI(OPh)<sub>4</sub> synthesized from [NEt<sub>3</sub>Me][PCI<sub>6</sub>] and phenol with a PPh<sub>3</sub>-capillary (12.1 μmol).

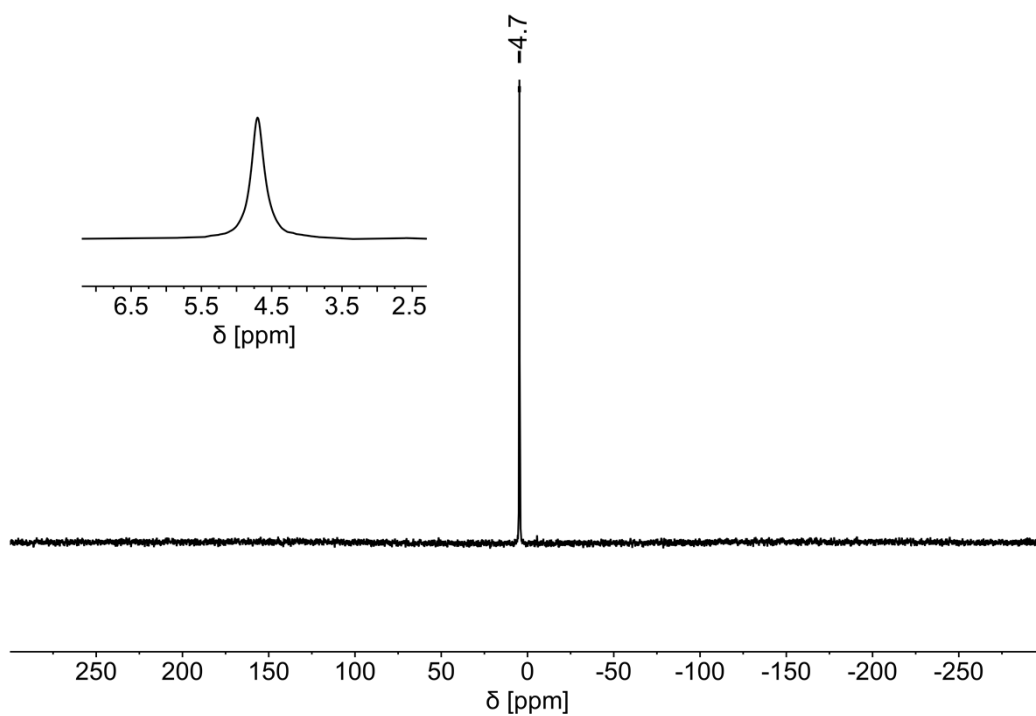

**Figure S18.**  $^{31}\text{P}\{^1\text{H}\}$  NMR spectrum ( $\text{CD}_2\text{Cl}_2$ ) of  $\text{POCl}_3$  synthesized from  $[\text{NEt}_3\text{Me}][\text{PCl}_6]$  and adamantyl carboxylic acid.

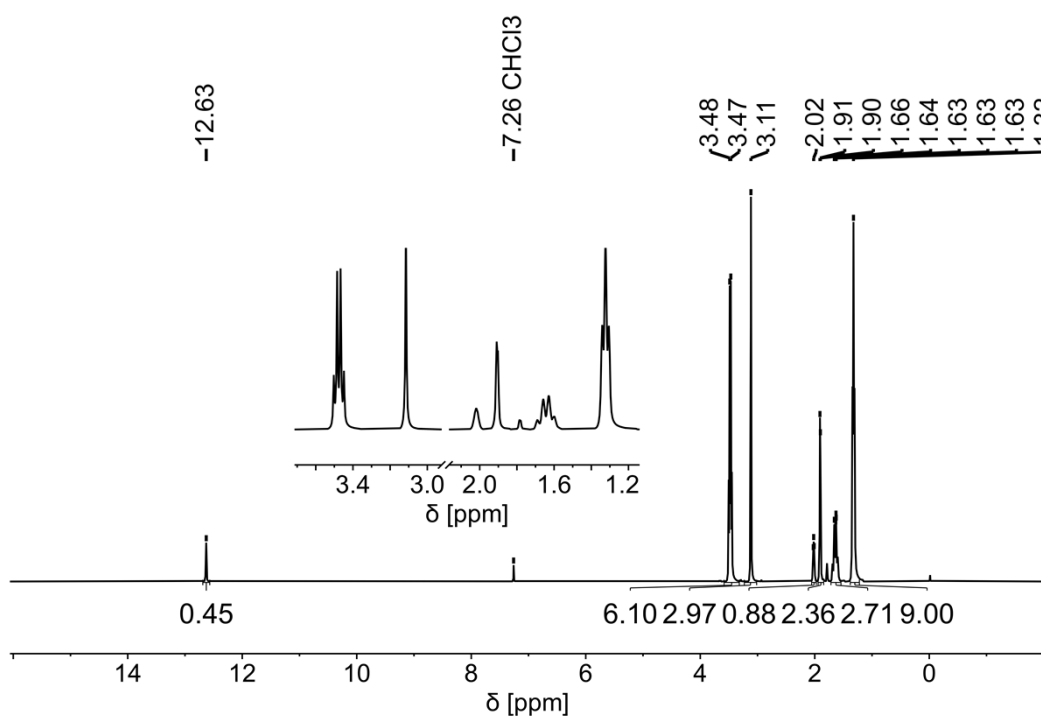

**Figure S19.**  $^1\text{H}$  NMR spectrum ( $\text{CD}_2\text{Cl}_2$ ) of  $\text{POCl}_3$  and  $[\text{NEt}_3\text{Me}][\text{Cl}(\text{HCl})_n]$  synthesized from  $[\text{NEt}_3\text{Me}][\text{PCl}_6]$  and adamantyl carboxylic acid.

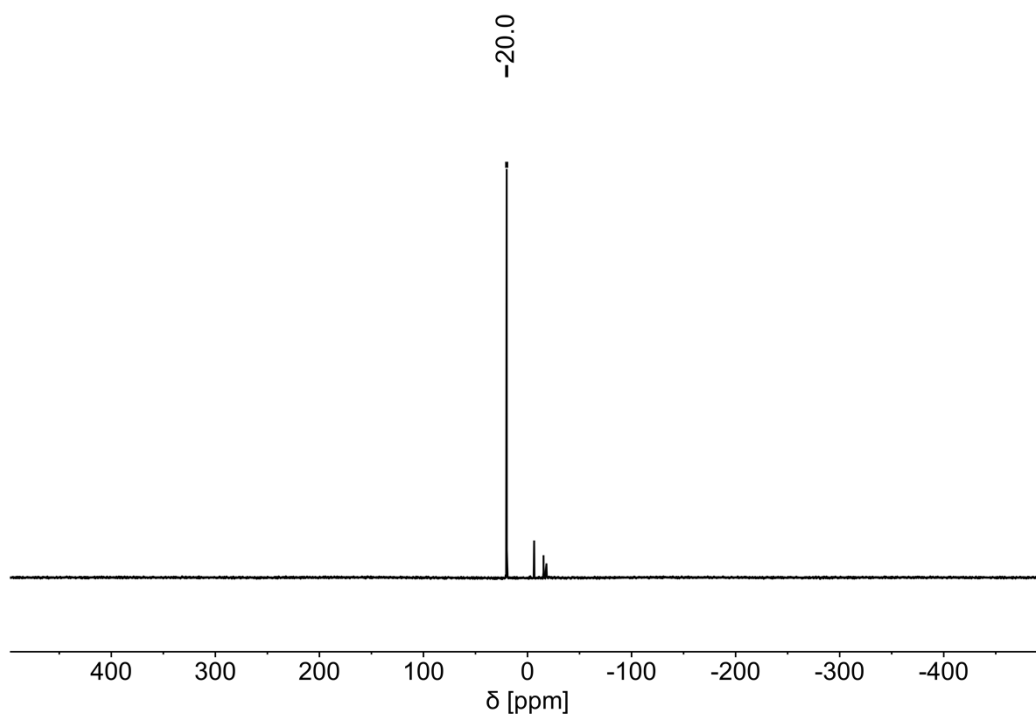

**Figure S20.**  $^{31}\text{P}\{^1\text{H}\}$  NMR spectrum (CD<sub>2</sub>Cl<sub>2</sub>) of hexaphosphabenzene synthesized from [NEt<sub>3</sub>Me][PCl<sub>6</sub>] and NH<sub>4</sub>Cl.

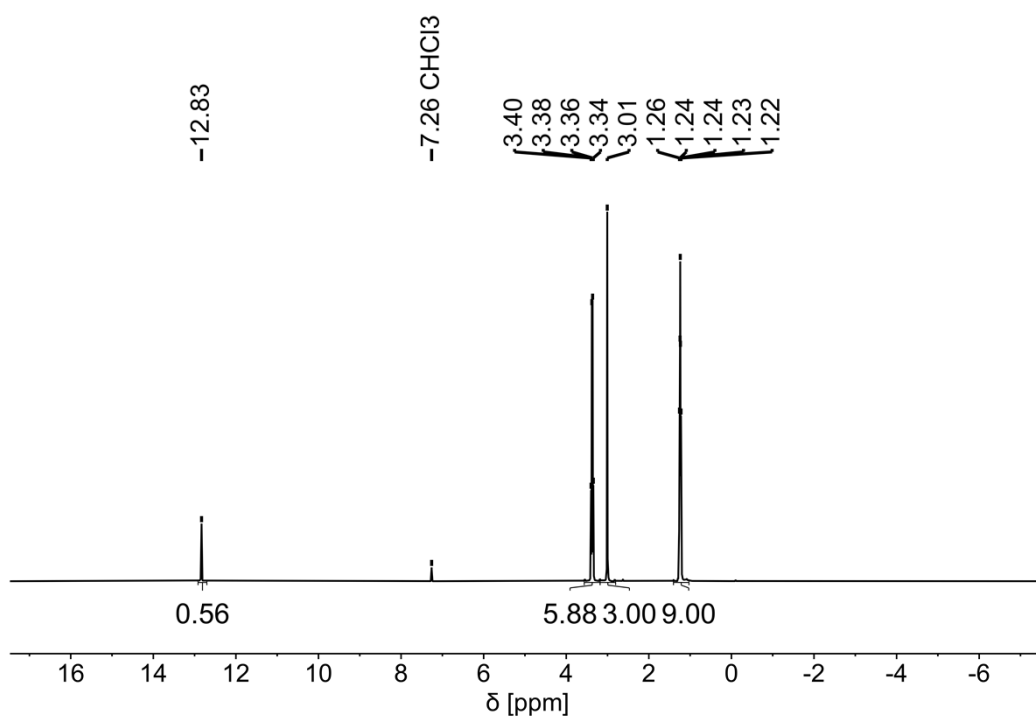

**Figure S21.**  $^1\text{H}$  NMR spectrum (CD<sub>2</sub>Cl<sub>2</sub>) of [NEt<sub>3</sub>Me](Cl(HCl)<sub>n</sub>) synthesized in the reaction between [NEt<sub>3</sub>Me][PCl<sub>6</sub>] and NH<sub>4</sub>Cl.

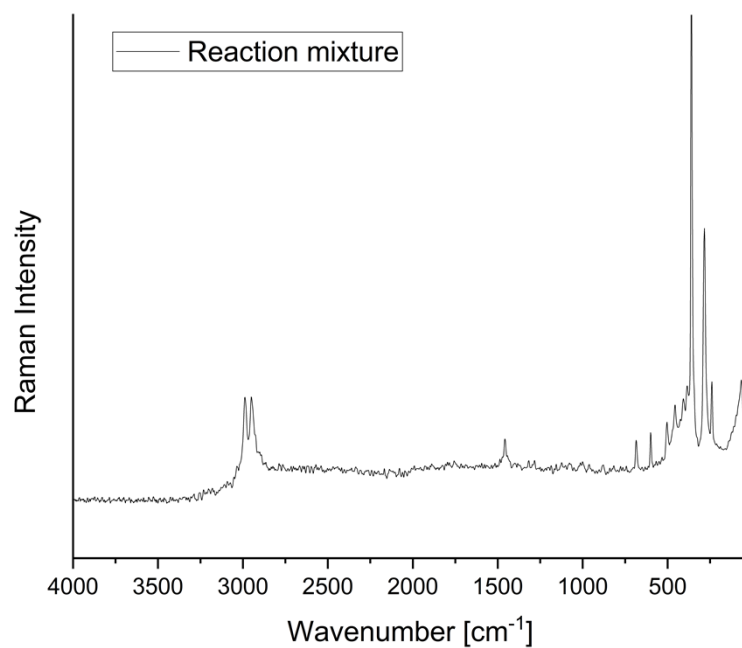

**Figure S22.** Experimental Raman spectrum of the mixture of [NEt<sub>3</sub>Me][PCl<sub>6</sub>] and red phosphorus recorded at room temperature.

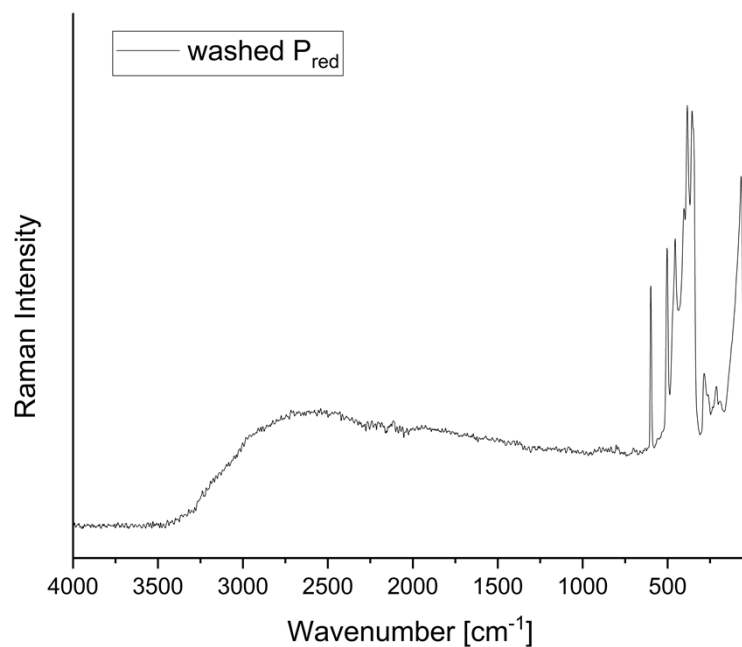

**Figure S23.** Experimental Raman spectrum of the isolated red phosphorus (P<sub>red</sub>) recorded at room temperature.

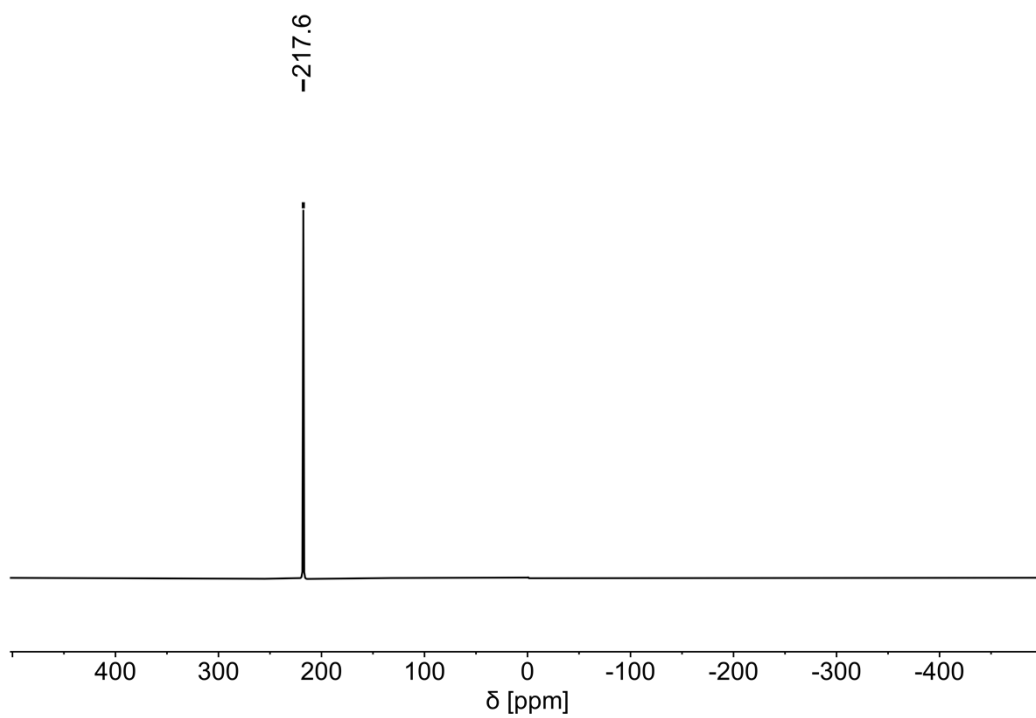

**Figure S24.**  $^{31}\text{P}$  NMR spectrum (neat) of  $\text{PCl}_3$  directly synthesized from  $\text{P}_4$  and  $[\text{NEt}_3\text{Me}][\text{Cl}_3]$ .

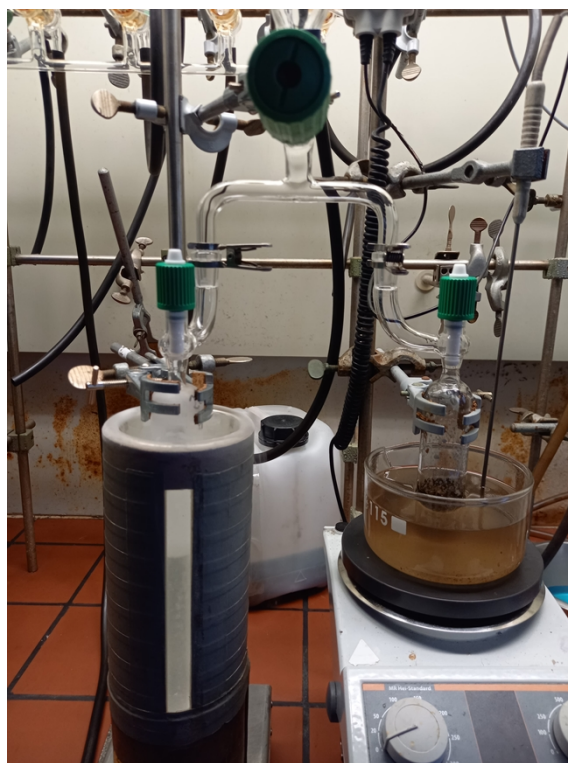

**Figure S25.** Experimental setup for the direct synthesis of  $\text{PCl}_3$  directly from  $\text{P}_4$  and  $[\text{NEt}_3\text{Me}][\text{Cl}_3]$ .

## Literature

- [1] P. Voßnacker, A. Wüst, T. Keilhack, C. Müller, S. Steinhauer, H. Beckers, S. Yogendra, Y. Schiesser, R. Weber, M. Reimann, R. Müller, M. Kaupp, S. Riedel, *Science Adv.*, 2021, **7**, eabj5186.
- [2] MestReNova 14.1.0-24037, Mestrelab Research S.L., 2019.
- [3] Sheldrick, G. M. *SADABS*; University of Göttingen: Germany, 1996.
- [4] Coppens, P. The Evaluation of Absorption and Extinction in Single-Crystal Structure Analysis. *Crystallographic Computing, Copenhagen, Muksgaard* 1979.
- [5] Sheldrick, G. M. A short history of SHELX. *Acta Crystallogr., Sect. A: Found. Crystallogr.* 2008, **A64**, 112.
- [6] Sheldrick, G. M. Crystal structure refinement with SHELXL. *Acta Crystallogr., Sect. C: Struct. Chem.* 2015, **C71**, 3.
- [7] *Diamond - Crystal and Molecular Structure Visualization; Crystal Impact* - Dr. H. Putz & Dr. K. Brandenburg GbR: Bonn, Germany. 2019.
- [8] L. W. Dennis, V. J. Bartuska, G. E. Maciel, *J. Am. Chem. Soc.* 1982, **104**, 230.
- [9] G. H. Dreyhsig, P. Voßnacker, M. Kleoff, H. Baunis, N. Limberg, M. Lu, R. Schomäcker, S. Riedel, *Science Adv.*, 2024, **10**, eadn5353.
- [10] D. S. Zurabishvili, T. J. Bukia, M. O. Lomidze, M. V. Trapaidze, E. N. Elizbarashvili, S. A. Samsoniya, T. V. Doroshenko, U. Kazmaier, *Chem. Heterocycl. Comp.*, 2015, **51**, 139.
- [11] R. A. Shaw, S. Ture, *Phosphorus, Sulfur Relat. Elem.*, 1991, **57**, 103.
- [12] J.R. Durig, J.M. Casper, *J. Mol. Struct.*, 1970, **5**, 351.
